# Supplementary material
Source: publisher figshare collection journal article supplement (https://acs.figshare.com/ndownloader/files/3940609)
Supplement: Supplementary file 1 [file 3940609]

 
data_1 
 
_audit_creation_method            SHELXL-97 
_chemical_name_systematic 
; 
 ? 
; 
_chemical_name_common             ? 
_chemical_melting_point           ? 
_chemical_formula_moiety          'C33 H30 N2 O2' 
_chemical_formula_sum 
 'C33 H30 N2 O2' 
_chemical_formula_weight          486.59 
 
loop_ 
 _atom_type_symbol 
 _atom_type_description 
 _atom_type_scat_dispersion_real 
 _atom_type_scat_dispersion_imag 
 _atom_type_scat_source 
 'C'  'C'   0.0033   0.0016 
 'International Tables Vol C Tables 4.2.6.8 and 6.1.1.4' 
 'H'  'H'   0.0000   0.0000 
 'International Tables Vol C Tables 4.2.6.8 and 6.1.1.4' 
 'N'  'N'   0.0061   0.0033 
 'International Tables Vol C Tables 4.2.6.8 and 6.1.1.4' 
 'O'  'O'   0.0106   0.0060 
 'International Tables Vol C Tables 4.2.6.8 and 6.1.1.4' 
 
_symmetry_cell_setting            'Monoclinic' 
_symmetry_space_group_name_H-M    'P 21/n '
_symmetry_space_group_name_HALL   '-P 2yn' 
 
loop_ 
 _symmetry_equiv_pos_as_xyz 
 'x, y, z' 
 '-x+1/2, y+1/2, -z+1/2' 
 '-x, -y, -z' 
 'x-1/2, -y-1/2, z-1/2' 
 
_cell_length_a                    14.110(5) 
_cell_length_b                    11.504(5) 
_cell_length_c                    17.793(5) 
_cell_angle_alpha                 90.000(5) 
_cell_angle_beta                  111.155(5) 
_cell_angle_gamma                 90.000(5) 
_cell_volume                      2693.5(17) 
_cell_formula_units_Z             4 
_cell_measurement_temperature     296(2) 
_cell_measurement_reflns_used     4928 
_cell_measurement_theta_min       2.30 
_cell_measurement_theta_max       24.48 
 
_exptl_crystal_description        diamond 
_exptl_crystal_colour             yellow 
_exptl_crystal_size_max           0.30 
_exptl_crystal_size_mid           0.20 
_exptl_crystal_size_min           0.20 
_exptl_crystal_density_meas       ? 
_exptl_crystal_density_diffrn     1.200 
_exptl_crystal_density_method     'not measured' 
_exptl_crystal_F_000              1032 
_exptl_absorpt_coefficient_mu     0.075 
_exptl_absorpt_correction_type    multi-scan 
_exptl_absorpt_correction_T_min   0.9780 
_exptl_absorpt_correction_T_max   0.9852 
_exptl_absorpt_process_details    sadabs 
 
_exptl_special_details 
; 
 ? 
; 
 
_diffrn_ambient_temperature       296(2) 
_diffrn_radiation_wavelength      0.71069 
_diffrn_radiation_type            MoK\a 
_diffrn_radiation_source          'fine-focus sealed tube' 
_diffrn_radiation_monochromator   graphite 
_diffrn_measurement_device_type   'CCD area detector' 
_diffrn_measurement_method        'phi and omega scans' 
_diffrn_detector_area_resol_mean  ? 
_diffrn_standards_number          ? 
_diffrn_standards_interval_count  ? 
_diffrn_standards_interval_time   ? 
_diffrn_standards_decay_%         ? 
_diffrn_reflns_number             18680 
_diffrn_reflns_av_R_equivalents   0.0255 
_diffrn_reflns_av_sigmaI/netI     0.0238 
_diffrn_reflns_limit_h_min        -16 
_diffrn_reflns_limit_h_max        15 
_diffrn_reflns_limit_k_min        -13 
_diffrn_reflns_limit_k_max        13 
_diffrn_reflns_limit_l_min        -20 
_diffrn_reflns_limit_l_max        21 
_diffrn_reflns_theta_min          1.59 
_diffrn_reflns_theta_max          25.00 
_reflns_number_total              4744 
_reflns_number_gt                 3314 
_reflns_threshold_expression      >2sigma(I) 
 
_computing_data_collection        'Bruker SMART' 
_computing_cell_refinement        'Bruker SMART' 
_computing_data_reduction         'Bruker SAINT' 
_computing_structure_solution     'SHELXS-97 (Sheldrick, 1990)' 
_computing_structure_refinement   'SHELXL-97 (Sheldrick, 1997)' 
_computing_molecular_graphics     'Bruker SHELXTL' 
_computing_publication_material   'Bruker SHELXTL' 
 
_refine_special_details 
; 
 Refinement of F^2^ against ALL reflections.  The weighted R-factor wR and 
 goodness of fit S are based on F^2^, conventional R-factors R are based 
 on F, with F set to zero for negative F^2^. The threshold expression of 
 F^2^ > 2sigma(F^2^) is used only for calculating R-factors(gt) etc. and is 
 not relevant to the choice of reflections for refinement.  R-factors based 
 on F^2^ are statistically about twice as large as those based on F, and R- 
 factors based on ALL data will be even larger. 
; 
 
_refine_ls_structure_factor_coef  Fsqd  
_refine_ls_matrix_type            full 
_refine_ls_weighting_scheme       calc  
_refine_ls_weighting_details 
 'calc w=1/[\s^2^(Fo^2^)+(0.0734P)^2^+0.9382P] where P=(Fo^2^+2Fc^2^)/3' 
_atom_sites_solution_primary      direct 
_atom_sites_solution_secondary    difmap 
_atom_sites_solution_hydrogens    geom 
_refine_ls_hydrogen_treatment     constr 
_refine_ls_extinction_method      none 
_refine_ls_extinction_coef        ? 
_refine_ls_number_reflns          4744 
_refine_ls_number_parameters      337 
_refine_ls_number_restraints      0 
_refine_ls_R_factor_all           0.0774 
_refine_ls_R_factor_gt            0.0529 
_refine_ls_wR_factor_ref          0.1583 
_refine_ls_wR_factor_gt           0.1393 
_refine_ls_goodness_of_fit_ref    1.015 
_refine_ls_restrained_S_all       1.015 
_refine_ls_shift/su_max           0.070 
_refine_ls_shift/su_mean          0.002 
 
loop_ 
 _atom_site_label 
 _atom_site_type_symbol 
 _atom_site_fract_x 
 _atom_site_fract_y 
 _atom_site_fract_z 
 _atom_site_U_iso_or_equiv 
 _atom_site_adp_type 
 _atom_site_occupancy 
 _atom_site_symmetry_multiplicity 
 _atom_site_calc_flag 
 _atom_site_refinement_flags 
 _atom_site_disorder_assembly 
 _atom_site_disorder_group 
N1 N 0.01108(14) 0.25962(15) 0.62659(11) 0.0571(5) Uani 1 1 d . . . 
C23 C 0.52496(16) 0.43807(19) 0.34832(12) 0.0521(5) Uani 1 1 d . . . 
C21 C 0.42742(16) 0.33917(18) 0.42011(13) 0.0530(5) Uani 1 1 d . . . 
O2 O 0.60591(13) 0.65919(17) 0.24116(11) 0.0799(5) Uani 1 1 d . . . 
C16 C 0.24646(17) 0.26988(18) 0.53282(12) 0.0517(5) Uani 1 1 d . . . 
C6 C -0.05046(17) 0.16356(19) 0.62430(13) 0.0549(5) Uani 1 1 d . . . 
C13 C 0.09126(17) 0.26376(18) 0.59603(13) 0.0528(5) Uani 1 1 d . . . 
C29 C 0.54144(17) 0.5397(2) 0.31473(13) 0.0552(5) Uani 1 1 d . . . 
C17 C 0.24389(18) 0.18528(19) 0.58804(14) 0.0593(6) Uani 1 1 d . . . 
H17 H 0.2950 0.1295 0.6042 0.071 Uiso 1 1 calc R . . 
C19 C 0.32784(18) 0.26712(19) 0.50031(13) 0.0553(5) Uani 1 1 d . . . 
H19 H 0.3734 0.2056 0.5170 0.066 Uiso 1 1 calc R . . 
C31 C 0.61898(19) 0.5570(2) 0.27773(13) 0.0623(6) Uani 1 1 d . . . 
C20 C 0.34426(17) 0.34231(19) 0.44974(13) 0.0550(5) Uani 1 1 d . . . 
H20 H 0.2979 0.4029 0.4316 0.066 Uiso 1 1 calc R . . 
C12 C -0.02257(17) 0.35328(19) 0.66076(13) 0.0561(6) Uani 1 1 d . . . 
C5 C -0.12324(17) 0.1961(2) 0.65775(13) 0.0577(6) Uani 1 1 d . . . 
C22 C 0.44346(17) 0.43097(19) 0.37938(13) 0.0545(5) Uani 1 1 d . . . 
H22 H 0.3994 0.4939 0.3706 0.065 Uiso 1 1 calc R . . 
C24 C 0.58464(18) 0.3281(2) 0.35414(13) 0.0599(6) Uani 1 1 d . . . 
H24A H 0.6512 0.3478 0.3536 0.072 Uiso 1 1 calc R . . 
H24B H 0.5505 0.2806 0.3071 0.072 Uiso 1 1 calc R . . 
C14 C 0.09266(18) 0.34872(19) 0.54131(14) 0.0589(6) Uani 1 1 d . . . 
H14 H 0.0412 0.4041 0.5251 0.071 Uiso 1 1 calc R . . 
C25 C 0.59771(18) 0.2573(2) 0.42950(14) 0.0593(6) Uani 1 1 d . . . 
O1 O 0.68501(15) 0.48930(18) 0.27900(12) 0.0871(6) Uani 1 1 d . . . 
C30 C 0.4778(2) 0.6377(2) 0.31249(14) 0.0617(6) Uani 1 1 d . . . 
C15 C 0.16901(18) 0.35223(19) 0.51068(14) 0.0585(6) Uani 1 1 d . . . 
H15 H 0.1690 0.4106 0.4745 0.070 Uiso 1 1 calc R . . 
C7 C -0.10526(17) 0.3170(2) 0.68006(13) 0.0589(6) Uani 1 1 d . . . 
C1 C -0.0474(2) 0.0526(2) 0.59525(14) 0.0671(6) Uani 1 1 d . . . 
H1 H 0.0001 0.0323 0.5724 0.080 Uiso 1 1 calc R . . 
C26 C 0.49445(19) 0.2342(2) 0.43523(16) 0.0665(6) Uani 1 1 d . . . 
H26A H 0.4601 0.1745 0.3965 0.080 Uiso 1 1 calc R . . 
H26B H 0.5045 0.2043 0.4885 0.080 Uiso 1 1 calc R . . 
C18 C 0.16793(18) 0.18175(19) 0.61941(14) 0.0589(6) Uani 1 1 d . . . 
H18 H 0.1682 0.1243 0.6563 0.071 Uiso 1 1 calc R . . 
N2 N 0.4268(2) 0.7140(2) 0.31289(17) 0.0934(8) Uani 1 1 d . . . 
C4 C -0.19247(19) 0.1145(3) 0.66301(16) 0.0733(7) Uani 1 1 d . . . 
H4 H -0.2409 0.1346 0.6850 0.088 Uiso 1 1 calc R . . 
C11 C 0.0179(2) 0.4640(2) 0.67889(16) 0.0694(7) Uani 1 1 d . . . 
H11 H 0.0747 0.4862 0.6675 0.083 Uiso 1 1 calc R . . 
C8 C -0.1514(2) 0.3966(3) 0.71616(16) 0.0762(7) Uani 1 1 d . . . 
H8 H -0.2074 0.3751 0.7289 0.091 Uiso 1 1 calc R . . 
C2 C -0.1176(2) -0.0270(2) 0.60155(16) 0.0804(8) Uani 1 1 d . . . 
H2 H -0.1174 -0.1025 0.5829 0.096 Uiso 1 1 calc R . . 
C10 C -0.0285(2) 0.5400(2) 0.71430(17) 0.0813(8) Uani 1 1 d . . . 
H10 H -0.0033 0.6151 0.7265 0.098 Uiso 1 1 calc R . . 
C27 C 0.6478(2) 0.1398(2) 0.42539(19) 0.0858(8) Uani 1 1 d . . . 
H27A H 0.7150 0.1529 0.4253 0.129 Uiso 1 1 calc R . . 
H27B H 0.6079 0.0998 0.3769 0.129 Uiso 1 1 calc R . . 
H27C H 0.6518 0.0935 0.4713 0.129 Uiso 1 1 calc R . . 
C28 C 0.6645(2) 0.3243(3) 0.50413(16) 0.0827(8) Uani 1 1 d . . . 
H28A H 0.6724 0.2797 0.5516 0.124 Uiso 1 1 calc R . . 
H28B H 0.6330 0.3974 0.5068 0.124 Uiso 1 1 calc R . . 
H28C H 0.7300 0.3380 0.5008 0.124 Uiso 1 1 calc R . . 
C9 C -0.1121(2) 0.5064(3) 0.73206(19) 0.0876(9) Uani 1 1 d . . . 
H9 H -0.1425 0.5599 0.7555 0.105 Uiso 1 1 calc R . . 
C3 C -0.1892(2) 0.0045(3) 0.63569(17) 0.0820(8) Uani 1 1 d . . . 
H3 H -0.2353 -0.0507 0.6398 0.098 Uiso 1 1 calc R . . 
C32 C 0.6722(2) 0.6854(4) 0.1963(2) 0.1130(13) Uani 1 1 d . . . 
H32A H 0.7307 0.7291 0.2303 0.136 Uiso 1 1 calc R . . 
H32B H 0.6964 0.6134 0.1811 0.136 Uiso 1 1 calc R . . 
C33 C 0.6208(3) 0.7489(4) 0.1280(3) 0.152(2) Uani 1 1 d . . . 
H33A H 0.5680 0.7020 0.0913 0.229 Uiso 1 1 calc R . . 
H33B H 0.6673 0.7725 0.1026 0.229 Uiso 1 1 calc R . . 
H33C H 0.5914 0.8166 0.1425 0.229 Uiso 1 1 calc R . . 
 
loop_ 
 _atom_site_aniso_label 
 _atom_site_aniso_U_11 
 _atom_site_aniso_U_22 
 _atom_site_aniso_U_33 
 _atom_site_aniso_U_23 
 _atom_site_aniso_U_13 
 _atom_site_aniso_U_12 
N1 0.0690(12) 0.0489(10) 0.0650(12) -0.0011(9) 0.0383(10) -0.0026(9) 
C23 0.0543(12) 0.0607(13) 0.0426(11) -0.0031(10) 0.0190(10) 0.0037(10) 
C21 0.0575(13) 0.0537(13) 0.0509(12) -0.0016(10) 0.0232(10) 0.0040(10) 
O2 0.0722(11) 0.0953(14) 0.0824(12) 0.0246(10) 0.0403(10) -0.0035(10) 
C16 0.0603(13) 0.0482(12) 0.0505(12) -0.0004(9) 0.0245(10) -0.0006(10) 
C6 0.0593(13) 0.0563(13) 0.0475(12) 0.0055(10) 0.0172(10) -0.0025(11) 
C13 0.0635(14) 0.0484(12) 0.0537(12) -0.0025(10) 0.0298(11) -0.0027(10) 
C29 0.0601(13) 0.0640(14) 0.0469(12) -0.0034(10) 0.0259(10) -0.0039(11) 
C17 0.0676(15) 0.0522(13) 0.0644(14) 0.0102(11) 0.0313(12) 0.0108(11) 
C19 0.0614(14) 0.0502(12) 0.0587(13) 0.0009(10) 0.0270(11) 0.0024(10) 
C31 0.0638(15) 0.0785(17) 0.0489(13) -0.0063(12) 0.0253(11) -0.0069(13) 
C20 0.0585(13) 0.0535(13) 0.0580(13) 0.0040(10) 0.0270(11) 0.0045(10) 
C12 0.0626(14) 0.0576(14) 0.0537(13) 0.0029(10) 0.0278(11) 0.0057(11) 
C5 0.0503(13) 0.0724(15) 0.0476(12) 0.0093(11) 0.0141(10) -0.0019(11) 
C22 0.0593(13) 0.0556(13) 0.0551(13) 0.0053(10) 0.0286(11) 0.0096(10) 
C24 0.0607(14) 0.0685(15) 0.0545(13) -0.0031(11) 0.0257(11) 0.0080(12) 
C14 0.0672(15) 0.0509(13) 0.0660(14) 0.0099(10) 0.0330(12) 0.0095(11) 
C25 0.0598(14) 0.0598(14) 0.0594(14) 0.0007(11) 0.0228(11) 0.0125(11) 
O1 0.0897(13) 0.0920(14) 0.1037(15) -0.0027(11) 0.0638(12) 0.0064(11) 
C30 0.0757(16) 0.0545(14) 0.0672(15) 0.0099(11) 0.0407(13) 0.0065(13) 
C15 0.0713(15) 0.0509(13) 0.0619(14) 0.0118(10) 0.0344(12) 0.0037(11) 
C7 0.0553(13) 0.0694(15) 0.0526(13) 0.0063(11) 0.0200(11) 0.0074(11) 
C1 0.0769(16) 0.0615(15) 0.0612(14) 0.0000(11) 0.0230(12) -0.0079(13) 
C26 0.0731(16) 0.0595(14) 0.0728(16) 0.0066(12) 0.0334(13) 0.0092(12) 
C18 0.0716(15) 0.0530(13) 0.0591(13) 0.0119(10) 0.0322(12) 0.0051(11) 
N2 0.117(2) 0.0697(15) 0.122(2) 0.0239(14) 0.0773(18) 0.0178(14) 
C4 0.0615(15) 0.088(2) 0.0678(16) 0.0115(14) 0.0196(13) -0.0101(14) 
C11 0.0836(18) 0.0549(14) 0.0831(17) -0.0054(12) 0.0462(15) -0.0002(13) 
C8 0.0680(16) 0.093(2) 0.0790(17) 0.0022(15) 0.0407(14) 0.0102(15) 
C2 0.090(2) 0.0664(16) 0.0697(17) 0.0016(13) 0.0112(15) -0.0178(15) 
C10 0.101(2) 0.0628(16) 0.095(2) -0.0111(14) 0.0533(18) 0.0024(15) 
C27 0.091(2) 0.0744(18) 0.103(2) 0.0109(15) 0.0479(18) 0.0291(15) 
C28 0.0781(18) 0.097(2) 0.0610(15) -0.0025(14) 0.0112(14) 0.0142(16) 
C9 0.099(2) 0.0758(19) 0.104(2) -0.0130(16) 0.0553(19) 0.0108(17) 
C3 0.0708(18) 0.089(2) 0.0762(18) 0.0161(15) 0.0138(15) -0.0258(15) 
C32 0.077(2) 0.182(4) 0.093(2) 0.044(2) 0.0455(18) -0.017(2) 
C33 0.128(3) 0.203(5) 0.164(4) 0.108(4) 0.099(3) 0.056(3) 
 
_geom_special_details 
; 
 All esds (except the esd in the dihedral angle between two l.s. planes) 
 are estimated using the full covariance matrix.  The cell esds are taken 
 into account individually in the estimation of esds in distances, angles 
 and torsion angles; correlations between esds in cell parameters are only 
 used when they are defined by crystal symmetry.  An approximate (isotropic) 
 treatment of cell esds is used for estimating esds involving l.s. planes. 
; 
 
loop_ 
 _geom_bond_atom_site_label_1 
 _geom_bond_atom_site_label_2 
 _geom_bond_distance 
 _geom_bond_site_symmetry_2 
 _geom_bond_publ_flag 
N1 C6 1.397(3) . ? 
N1 C12 1.402(3) . ? 
N1 C13 1.422(3) . ? 
C23 C29 1.371(3) . ? 
C23 C22 1.447(3) . ? 
C23 C24 1.503(3) . ? 
C21 C22 1.345(3) . ? 
C21 C20 1.450(3) . ? 
C21 C26 1.498(3) . ? 
O2 C31 1.324(3) . ? 
O2 C32 1.464(3) . ? 
C16 C15 1.392(3) . ? 
C16 C17 1.393(3) . ? 
C16 C19 1.461(3) . ? 
C6 C1 1.384(3) . ? 
C6 C5 1.411(3) . ? 
C13 C14 1.385(3) . ? 
C13 C18 1.382(3) . ? 
C29 C30 1.433(3) . ? 
C29 C31 1.480(3) . ? 
C17 C18 1.376(3) . ? 
C17 H17 0.9300 . ? 
C19 C20 1.327(3) . ? 
C19 H19 0.9300 . ? 
C31 O1 1.208(3) . ? 
C20 H20 0.9300 . ? 
C12 C11 1.386(3) . ? 
C12 C7 1.394(3) . ? 
C5 C4 1.382(3) . ? 
C5 C7 1.443(3) . ? 
C22 H22 0.9300 . ? 
C24 C25 1.522(3) . ? 
C24 H24A 0.9700 . ? 
C24 H24B 0.9700 . ? 
C14 C15 1.372(3) . ? 
C14 H14 0.9300 . ? 
C25 C26 1.520(3) . ? 
C25 C28 1.531(4) . ? 
C25 C27 1.539(3) . ? 
C30 N2 1.136(3) . ? 
C15 H15 0.9300 . ? 
C7 C8 1.406(3) . ? 
C1 C2 1.384(4) . ? 
C1 H1 0.9300 . ? 
C26 H26A 0.9700 . ? 
C26 H26B 0.9700 . ? 
C18 H18 0.9300 . ? 
C4 C3 1.363(4) . ? 
C4 H4 0.9300 . ? 
C11 C10 1.374(3) . ? 
C11 H11 0.9300 . ? 
C8 C9 1.368(4) . ? 
C8 H8 0.9300 . ? 
C2 C3 1.401(4) . ? 
C2 H2 0.9300 . ? 
C10 C9 1.382(4) . ? 
C10 H10 0.9300 . ? 
C27 H27A 0.9600 . ? 
C27 H27B 0.9600 . ? 
C27 H27C 0.9600 . ? 
C28 H28A 0.9600 . ? 
C28 H28B 0.9600 . ? 
C28 H28C 0.9600 . ? 
C9 H9 0.9300 . ? 
C3 H3 0.9300 . ? 
C32 C33 1.379(5) . ? 
C32 H32A 0.9700 . ? 
C32 H32B 0.9700 . ? 
C33 H33A 0.9600 . ? 
C33 H33B 0.9600 . ? 
C33 H33C 0.9600 . ? 
 
loop_ 
 _geom_angle_atom_site_label_1 
 _geom_angle_atom_site_label_2 
 _geom_angle_atom_site_label_3 
 _geom_angle 
 _geom_angle_site_symmetry_1 
 _geom_angle_site_symmetry_3 
 _geom_angle_publ_flag 
C6 N1 C12 108.45(18) . . ? 
C6 N1 C13 125.97(18) . . ? 
C12 N1 C13 125.52(18) . . ? 
C29 C23 C22 119.86(19) . . ? 
C29 C23 C24 124.72(19) . . ? 
C22 C23 C24 115.40(19) . . ? 
C22 C21 C20 119.5(2) . . ? 
C22 C21 C26 120.8(2) . . ? 
C20 C21 C26 119.75(19) . . ? 
C31 O2 C32 116.6(2) . . ? 
C15 C16 C17 117.2(2) . . ? 
C15 C16 C19 123.51(19) . . ? 
C17 C16 C19 119.2(2) . . ? 
C1 C6 N1 129.6(2) . . ? 
C1 C6 C5 121.9(2) . . ? 
N1 C6 C5 108.50(19) . . ? 
C14 C13 C18 119.0(2) . . ? 
C14 C13 N1 120.5(2) . . ? 
C18 C13 N1 120.44(19) . . ? 
C23 C29 C30 118.68(19) . . ? 
C23 C29 C31 125.3(2) . . ? 
C30 C29 C31 116.0(2) . . ? 
C18 C17 C16 121.9(2) . . ? 
C18 C17 H17 119.0 . . ? 
C16 C17 H17 119.0 . . ? 
C20 C19 C16 127.5(2) . . ? 
C20 C19 H19 116.3 . . ? 
C16 C19 H19 116.3 . . ? 
O1 C31 O2 123.5(2) . . ? 
O1 C31 C29 126.5(2) . . ? 
O2 C31 C29 110.1(2) . . ? 
C19 C20 C21 126.3(2) . . ? 
C19 C20 H20 116.8 . . ? 
C21 C20 H20 116.8 . . ? 
C11 C12 C7 122.0(2) . . ? 
C11 C12 N1 129.2(2) . . ? 
C7 C12 N1 108.7(2) . . ? 
C4 C5 C6 119.3(2) . . ? 
C4 C5 C7 133.9(2) . . ? 
C6 C5 C7 106.80(19) . . ? 
C21 C22 C23 124.2(2) . . ? 
C21 C22 H22 117.9 . . ? 
C23 C22 H22 117.9 . . ? 
C23 C24 C25 113.47(18) . . ? 
C23 C24 H24A 108.9 . . ? 
C25 C24 H24A 108.9 . . ? 
C23 C24 H24B 108.9 . . ? 
C25 C24 H24B 108.9 . . ? 
H24A C24 H24B 107.7 . . ? 
C15 C14 C13 120.8(2) . . ? 
C15 C14 H14 119.6 . . ? 
C13 C14 H14 119.6 . . ? 
C24 C25 C26 109.77(19) . . ? 
C24 C25 C28 109.6(2) . . ? 
C26 C25 C28 109.6(2) . . ? 
C24 C25 C27 109.86(19) . . ? 
C26 C25 C27 108.5(2) . . ? 
C28 C25 C27 109.5(2) . . ? 
N2 C30 C29 177.7(3) . . ? 
C14 C15 C16 121.1(2) . . ? 
C14 C15 H15 119.5 . . ? 
C16 C15 H15 119.5 . . ? 
C12 C7 C8 119.0(2) . . ? 
C12 C7 C5 107.5(2) . . ? 
C8 C7 C5 133.5(2) . . ? 
C2 C1 C6 117.4(3) . . ? 
C2 C1 H1 121.3 . . ? 
C6 C1 H1 121.3 . . ? 
C21 C26 C25 113.9(2) . . ? 
C21 C26 H26A 108.8 . . ? 
C25 C26 H26A 108.8 . . ? 
C21 C26 H26B 108.8 . . ? 
C25 C26 H26B 108.8 . . ? 
H26A C26 H26B 107.7 . . ? 
C17 C18 C13 119.8(2) . . ? 
C17 C18 H18 120.1 . . ? 
C13 C18 H18 120.1 . . ? 
C3 C4 C5 119.4(3) . . ? 
C3 C4 H4 120.3 . . ? 
C5 C4 H4 120.3 . . ? 
C10 C11 C12 117.8(2) . . ? 
C10 C11 H11 121.1 . . ? 
C12 C11 H11 121.1 . . ? 
C9 C8 C7 118.4(3) . . ? 
C9 C8 H8 120.8 . . ? 
C7 C8 H8 120.8 . . ? 
C1 C2 C3 120.9(3) . . ? 
C1 C2 H2 119.5 . . ? 
C3 C2 H2 119.5 . . ? 
C11 C10 C9 121.0(3) . . ? 
C11 C10 H10 119.5 . . ? 
C9 C10 H10 119.5 . . ? 
C25 C27 H27A 109.5 . . ? 
C25 C27 H27B 109.5 . . ? 
H27A C27 H27B 109.5 . . ? 
C25 C27 H27C 109.5 . . ? 
H27A C27 H27C 109.5 . . ? 
H27B C27 H27C 109.5 . . ? 
C25 C28 H28A 109.5 . . ? 
C25 C28 H28B 109.5 . . ? 
H28A C28 H28B 109.5 . . ? 
C25 C28 H28C 109.5 . . ? 
H28A C28 H28C 109.5 . . ? 
H28B C28 H28C 109.5 . . ? 
C8 C9 C10 121.8(3) . . ? 
C8 C9 H9 119.1 . . ? 
C10 C9 H9 119.1 . . ? 
C4 C3 C2 121.1(3) . . ? 
C4 C3 H3 119.4 . . ? 
C2 C3 H3 119.4 . . ? 
C33 C32 O2 110.7(3) . . ? 
C33 C32 H32A 109.5 . . ? 
O2 C32 H32A 109.5 . . ? 
C33 C32 H32B 109.5 . . ? 
O2 C32 H32B 109.5 . . ? 
H32A C32 H32B 108.1 . . ? 
C32 C33 H33A 109.5 . . ? 
C32 C33 H33B 109.5 . . ? 
H33A C33 H33B 109.5 . . ? 
C32 C33 H33C 109.5 . . ? 
H33A C33 H33C 109.5 . . ? 
H33B C33 H33C 109.5 . . ? 
 
loop_ 
 _geom_torsion_atom_site_label_1 
 _geom_torsion_atom_site_label_2 
 _geom_torsion_atom_site_label_3 
 _geom_torsion_atom_site_label_4 
 _geom_torsion 
 _geom_torsion_site_symmetry_1 
 _geom_torsion_site_symmetry_2 
 _geom_torsion_site_symmetry_3 
 _geom_torsion_site_symmetry_4 
 _geom_torsion_publ_flag 
C12 N1 C6 C1 179.2(2) . . . . ? 
C13 N1 C6 C1 2.0(4) . . . . ? 
C12 N1 C6 C5 -0.4(2) . . . . ? 
C13 N1 C6 C5 -177.67(19) . . . . ? 
C6 N1 C13 C14 125.6(2) . . . . ? 
C12 N1 C13 C14 -51.2(3) . . . . ? 
C6 N1 C13 C18 -53.2(3) . . . . ? 
C12 N1 C13 C18 130.0(2) . . . . ? 
C22 C23 C29 C30 1.0(3) . . . . ? 
C24 C23 C29 C30 179.3(2) . . . . ? 
C22 C23 C29 C31 -177.2(2) . . . . ? 
C24 C23 C29 C31 1.1(3) . . . . ? 
C15 C16 C17 C18 0.5(3) . . . . ? 
C19 C16 C17 C18 -178.5(2) . . . . ? 
C15 C16 C19 C20 3.6(4) . . . . ? 
C17 C16 C19 C20 -177.5(2) . . . . ? 
C32 O2 C31 O1 4.0(4) . . . . ? 
C32 O2 C31 C29 -175.5(2) . . . . ? 
C23 C29 C31 O1 -8.2(4) . . . . ? 
C30 C29 C31 O1 173.6(2) . . . . ? 
C23 C29 C31 O2 171.3(2) . . . . ? 
C30 C29 C31 O2 -6.9(3) . . . . ? 
C16 C19 C20 C21 178.2(2) . . . . ? 
C22 C21 C20 C19 -169.5(2) . . . . ? 
C26 C21 C20 C19 10.4(4) . . . . ? 
C6 N1 C12 C11 176.4(2) . . . . ? 
C13 N1 C12 C11 -6.3(4) . . . . ? 
C6 N1 C12 C7 -0.1(2) . . . . ? 
C13 N1 C12 C7 177.21(19) . . . . ? 
C1 C6 C5 C4 1.1(3) . . . . ? 
N1 C6 C5 C4 -179.2(2) . . . . ? 
C1 C6 C5 C7 -179.0(2) . . . . ? 
N1 C6 C5 C7 0.7(2) . . . . ? 
C20 C21 C22 C23 178.93(19) . . . . ? 
C26 C21 C22 C23 -1.0(3) . . . . ? 
C29 C23 C22 C21 -173.4(2) . . . . ? 
C24 C23 C22 C21 8.1(3) . . . . ? 
C29 C23 C24 C25 146.4(2) . . . . ? 
C22 C23 C24 C25 -35.2(3) . . . . ? 
C18 C13 C14 C15 -0.2(3) . . . . ? 
N1 C13 C14 C15 -179.1(2) . . . . ? 
C23 C24 C25 C26 53.8(3) . . . . ? 
C23 C24 C25 C28 -66.5(3) . . . . ? 
C23 C24 C25 C27 173.1(2) . . . . ? 
C23 C29 C30 N2 26(8) . . . . ? 
C31 C29 C30 N2 -155(8) . . . . ? 
C13 C14 C15 C16 0.8(4) . . . . ? 
C17 C16 C15 C14 -0.9(3) . . . . ? 
C19 C16 C15 C14 178.0(2) . . . . ? 
C11 C12 C7 C8 2.5(3) . . . . ? 
N1 C12 C7 C8 179.3(2) . . . . ? 
C11 C12 C7 C5 -176.3(2) . . . . ? 
N1 C12 C7 C5 0.5(2) . . . . ? 
C4 C5 C7 C12 179.2(2) . . . . ? 
C6 C5 C7 C12 -0.8(2) . . . . ? 
C4 C5 C7 C8 0.6(5) . . . . ? 
C6 C5 C7 C8 -179.3(3) . . . . ? 
N1 C6 C1 C2 179.2(2) . . . . ? 
C5 C6 C1 C2 -1.2(3) . . . . ? 
C22 C21 C26 C25 21.2(3) . . . . ? 
C20 C21 C26 C25 -158.8(2) . . . . ? 
C24 C25 C26 C21 -46.2(3) . . . . ? 
C28 C25 C26 C21 74.1(3) . . . . ? 
C27 C25 C26 C21 -166.3(2) . . . . ? 
C16 C17 C18 C13 0.1(4) . . . . ? 
C14 C13 C18 C17 -0.2(3) . . . . ? 
N1 C13 C18 C17 178.6(2) . . . . ? 
C6 C5 C4 C3 -0.1(4) . . . . ? 
C7 C5 C4 C3 180.0(2) . . . . ? 
C7 C12 C11 C10 -2.4(4) . . . . ? 
N1 C12 C11 C10 -178.5(2) . . . . ? 
C12 C7 C8 C9 -1.0(4) . . . . ? 
C5 C7 C8 C9 177.5(3) . . . . ? 
C6 C1 C2 C3 0.3(4) . . . . ? 
C12 C11 C10 C9 0.7(4) . . . . ? 
C7 C8 C9 C10 -0.6(4) . . . . ? 
C11 C10 C9 C8 0.7(5) . . . . ? 
C5 C4 C3 C2 -0.7(4) . . . . ? 
C1 C2 C3 C4 0.6(4) . . . . ? 
C31 O2 C32 C33 144.6(4) . . . . ? 
 
_diffrn_measured_fraction_theta_max    0.999 
_diffrn_reflns_theta_full              25.00 
_diffrn_measured_fraction_theta_full   0.999 
_refine_diff_density_max    0.208 
_refine_diff_density_min   -0.333 
_refine_diff_density_rms    0.032 
